# Supplementary material for: Genome-Wide Association Study Reveals a Genomic Region Associated with Mite-Recruitment Phenotypes in the Domesticated Grapevine (Vitis vinifera)
Source: MDPI journal article supplement (doi:10.3390/genes12071013), 2021-06-30
Supplement: s1 [file s1]

Supplementary data to: **Genome-wide association study reveals genomic region associated with beneficial mite recruitment phenotypes in the domesticated grapevine (*Vitis vinifera*)**

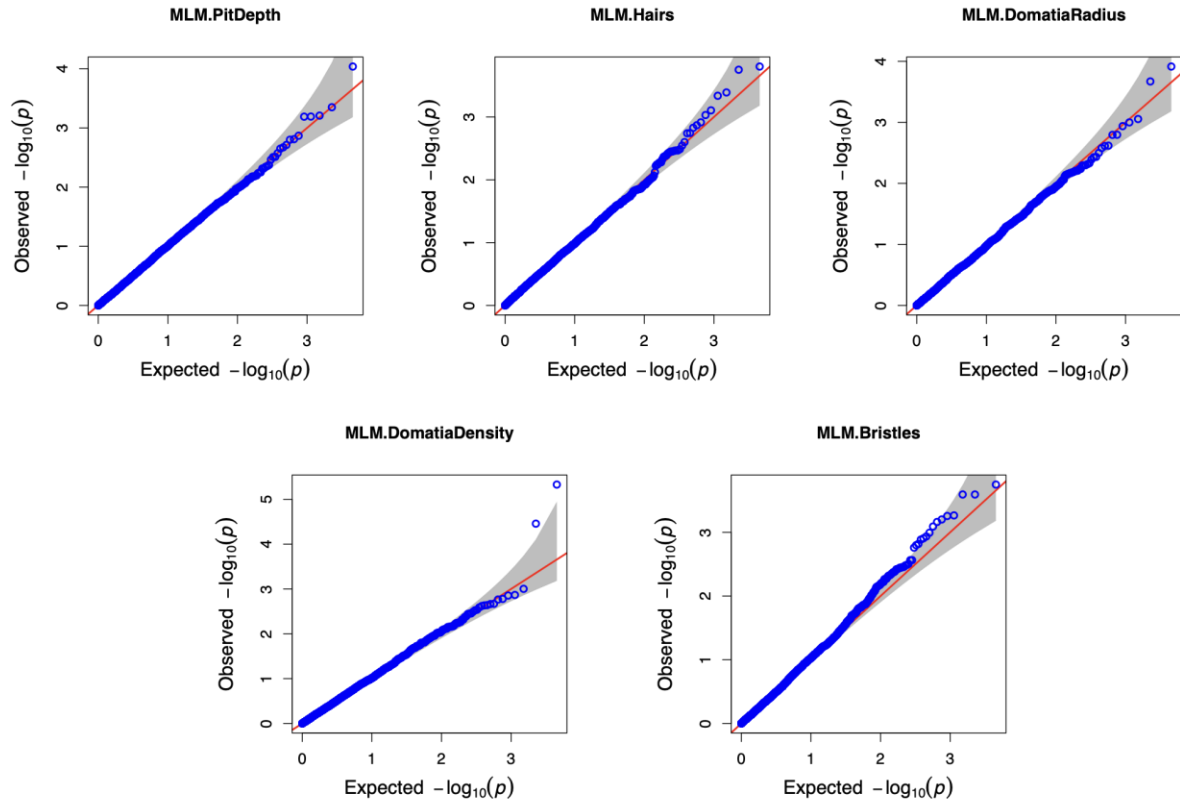

Figure S1: QQ plots for the five mite-recruitment phenotypes.

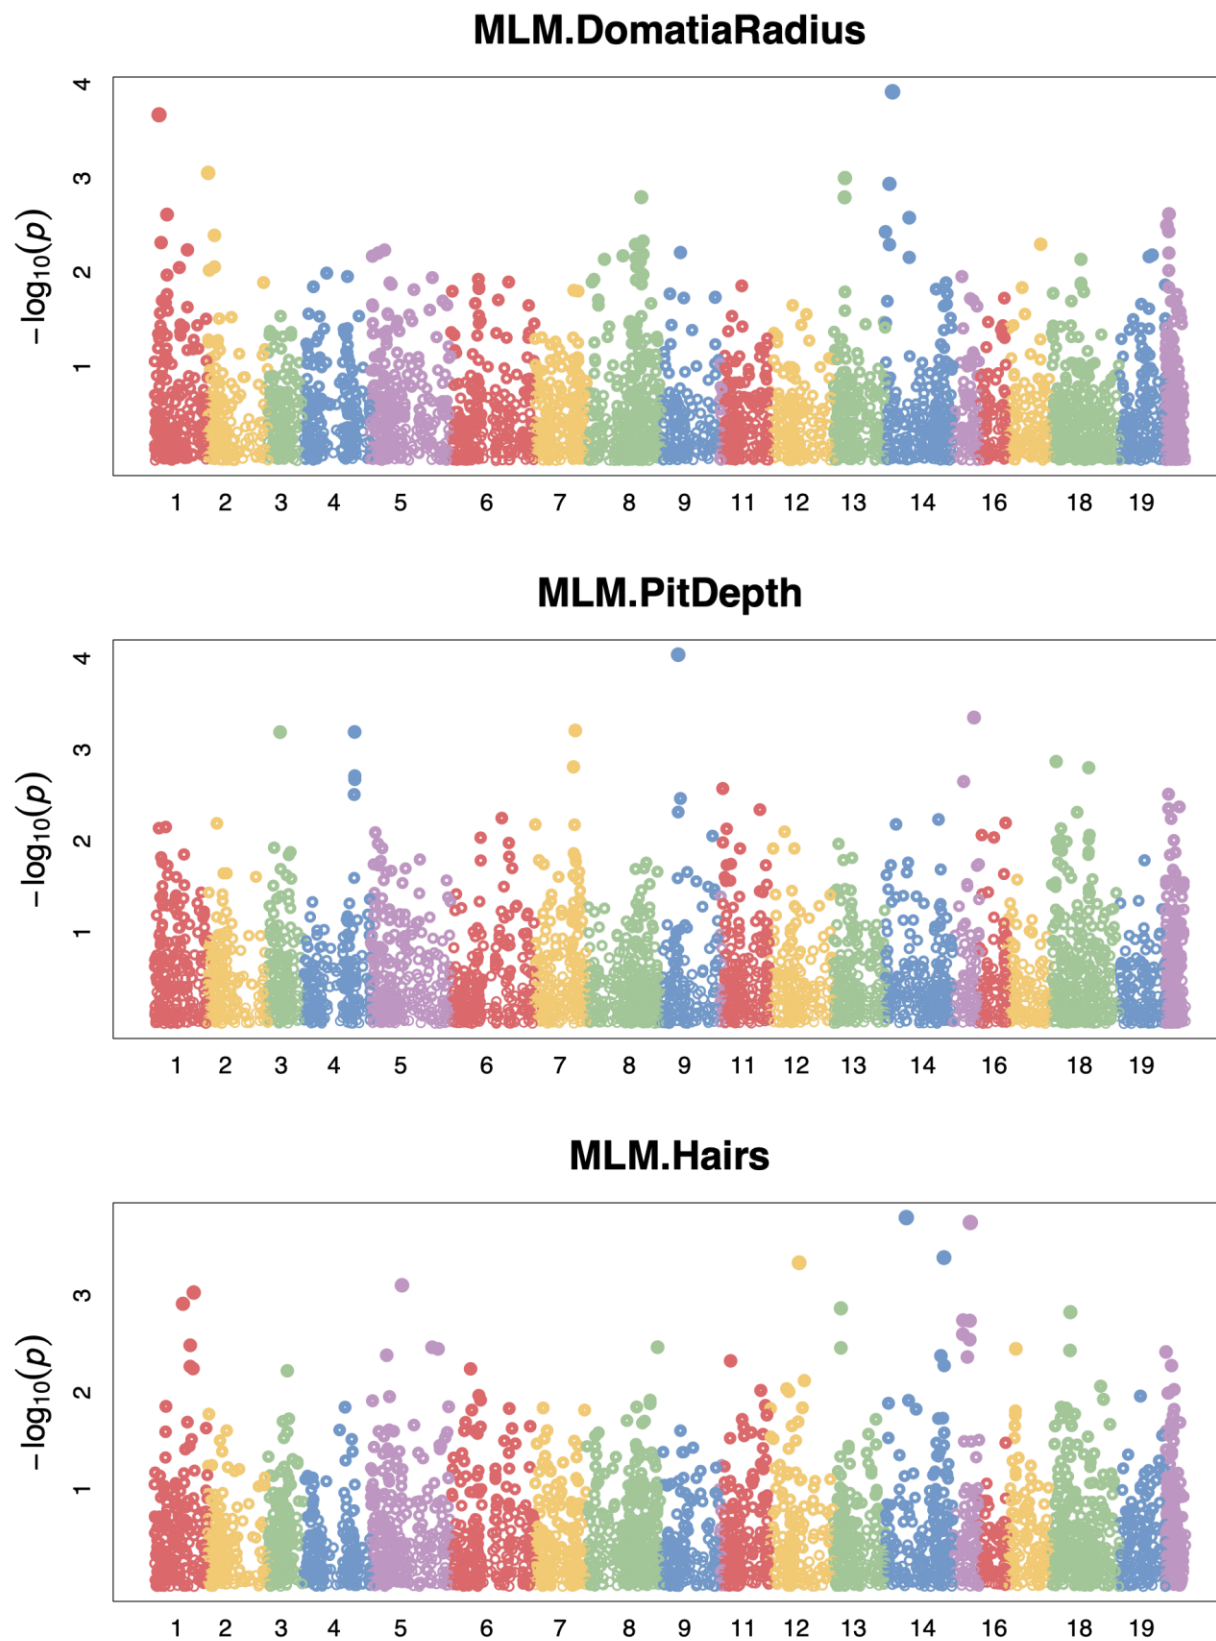

Figure S2: Manhattan plots for domatia size, depth, and leaf hairs.
